# Supplementary material for: Prediction and associations of preterm birth and its subtypes with eicosanoid enzymatic pathways and inflammatory markers
Source: PubMed Central journal article supplement (PMC6863859; doi:10.1038/s41598-019-53448-z), 2019-11-19
Supplement: 41598_2019_53448_MOESM1_ESM.pdf [file 41598_2019_53448_MOESM1_ESM.pdf]

## Supplementary Material

**Title:** Prediction and associations of preterm birth and its subtypes with eicosanoid enzymatic pathways and inflammatory markers

**Authors:** Max T. Aung<sup>1</sup>, Youfei Yu<sup>2</sup>, Kelly K. Ferguson<sup>3</sup>, David E. Cantonwine<sup>4</sup>, Lixia Zeng<sup>5</sup>, Thomas F. McElrath<sup>4</sup>, Subramaniam Pennathur<sup>5,6,7</sup>, Bhramar Mukherjee<sup>2,8</sup>, John D. Meeker<sup>1</sup>

<sup>1</sup>Department of Environmental Health Sciences, University of Michigan School of Public Health, Ann Arbor, MI, US

<sup>2</sup>Department of Biostatistics, University of Michigan School of Public Health, Ann Arbor, MI, US

<sup>3</sup>Epidemiology Branch, National Institute of Environmental Health Sciences, Research Triangle Park, NC, US

<sup>4</sup>Division of Maternal and Fetal Medicine, Brigham and Women's Hospital, Harvard Medical School, Boston, MA, US

<sup>5</sup>Department of Internal Medicine-Nephrology, University of Michigan, Ann Arbor, MI, US

<sup>6</sup>Michigan Regional Comprehensive Metabolomics Resource Core, University of Michigan, Ann Arbor, MI, US

<sup>7</sup>Department of Molecular and Integrative Physiology, University of Michigan, Ann Arbor, MI, US

<sup>8</sup>Department of Epidemiology, University of Michigan School of Public Health, Ann Arbor, MI, US

| Plasma Lipid Parent Compounds |                |
|-------------------------------|----------------|
| $\alpha$ -linolenic acid      | [ $\alpha$ LA] |
| Arachidonic acid              | [AA]           |
| Docosahexaenoic acid          | [DHA]          |
| Eicosapentaenoic acid         | [EPA]          |
| Linoleic acid                 | [LA]           |

  

| Plasma Eicosanoids: Cyclooxygenase Pathway      |                           |
|-------------------------------------------------|---------------------------|
| 13,14-dihydro-15-keto-prostaglandin D2          | [3,14DHK-PGD2]            |
| 13,14-dihydro-15-keto-prostaglandin F2 $\alpha$ | [13,14DHK-PGF2 $\alpha$ ] |
| 15-deoxy-12,14-prostaglandin J2                 | [15DO12,14-PGJ2]          |
| 9-oxooctadeca-dienoic acid                      | [9-oxoODE]                |
| Bicyclo-prostaglandin E1                        | [BCPGE1]                  |
| Bicycle-prostaglandin E2                        | [BCPGE2]                  |
| Prostaglandin A2                                | [PGA2]                    |
| Prostaglandin B2                                | [PGB2]                    |
| Prostaglandin D2                                | [PGD2]                    |
| Prostaglandin D3                                | [PGD3]                    |
| Prostaglandin E1                                | [PGE1]                    |
| Prostaglandin E2                                | [PGE2]                    |
| Prostaglandin E3                                | [PGE3]                    |
| Prostaglandin J2                                | [PGJ2]                    |
| Thromboxane B2                                  | [TXB2]                    |

  

| Plasma Eicosanoids: Lipoxygenase Pathway |             |
|------------------------------------------|-------------|
| Resolvin D1                              | [RVD1]      |
| Resolvin D2                              | [RVD2]      |
| Leukotriene B4                           | [LTB4]      |
| Leukotriene C4 methyl-ester              | [LTC4-ME]   |
| Leukotriene D4                           | [LTD4]      |
| Leukotriene E4                           | [LTE4]      |
| 13S-hydroxy-octadecadienoic acid         | [13S-HODE]  |
| 5-hydroxy-eicosatetraenoic acid          | [5-HETE]    |
| 8-hydroxy-eicosatetraenoic acid          | [8-HETE]    |
| 12-hydroxy-eicosatetraenoic acid         | [12-HETE]   |
| 15-hydroxy-eicosatetraenoic acid         | [15-HETE]   |
| 13-oxooctadeca-dienoic acid              | [13-oxoODE] |
| 5-oxoeicosatetraenoic acid               | [5-oxoETE]  |
| 12-oxoeicosatetraenoic acid              | [12-oxoETE] |
| 15-oxoeicosatetraenoic acid              | [15-oxoETE] |

  

| Plasma Eicosanoids: Cytochrome P450 Pathway |                |
|---------------------------------------------|----------------|
| 12,13-dihydroxy-octadecenoic acid           | [12,13-DiHOME] |
| 9,10-dihydroxy-octadecenoic acid            | [9,10-DiHOME]  |
| 5,6-dihydroxy-eicosatrienoic acid           | [5,6-DHET]     |
| 8,9-dihydroxy-eicosatrienoic acid           | [8,9-DHET]     |
| 11,12-dihydroxy-eicosatrienoic acid         | [11,12-DHET]   |
| 5,6-epoxy-eicosatrienoic acid               | [5(6)-EET]     |
| 8,9-epoxy-eicosatrienoic acid               | [8(9)-EET]     |
| 14,15-epoxy-eicosatrienoic acid             | [14(15)-EET]   |
| 11,12-epoxy-eicosatrienoic acid             | [11(12)-EET]   |
| 9,10-epoxy-octadecenoic acid                | [9(10)-EpoME]  |
| 12,13-epoxy-octadecenoic acid               | [12(13)-EpoME] |
| 20-carboxy arachidonic acid                 | [CAA]          |
| 11-hydroxy-eicosatetraenoic acid            | [11-HETE]      |
| 16-hydroxy-eicosatetraenoic acid            | [16-HETE]      |
| 17-hydroxy-eicosatetraenoic acid            | [17-HETE]      |
| 18-hydroxy-eicosatetraenoic acid            | [18-HETE]      |
| 20-hydroxy-eicosatetraenoic acid            | [20-HETE]      |
| 9S-hydroxy-octadecadienoic acid             | [9S-HODE]      |

  

| Plasma Inflammation Markers    |                |
|--------------------------------|----------------|
| C-reactive protein             | [CRP]          |
| Interleukin-1 $\beta$          | [IL1 $\beta$ ] |
| Interleukin-6                  | [IL6]          |
| Interleukin-10                 | [IL10]         |
| Tumor necrosis factor $\alpha$ | [TNF]          |

  

| Plasma Protein Damage Markers |      |
|-------------------------------|------|
| 3-nitrotyrosine               | [NY] |
| <i>o,o'</i> -dityrosine       | [DY] |
| 3-chlorotyrosine              | [CY] |

  

| Plasma Angiogenic Markers          |          |
|------------------------------------|----------|
| Placental growth factor            | [PGF]    |
| Soluble fms-like tyrosine kinase-1 | [sFlt-1] |

  

| Urinary Oxidative Stress Markers |          |
|----------------------------------|----------|
| 8-hydroxydeoxyguanosine          | [8-OHdG] |
| 8-isoprostane                    | [8-IP]   |

**Supplemental Figure 1.** Schematic representation of individual biomarkers according to the media in which they were measured and the group they belong to.

**A All Preterm and Control (Weighted)**

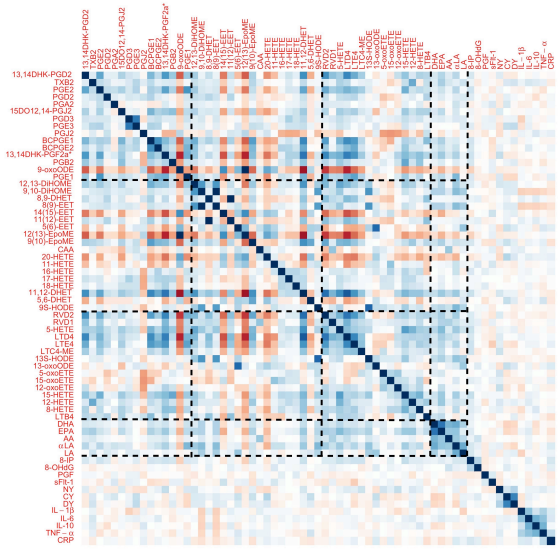

**B Spontaneous and Control (Weighted)**

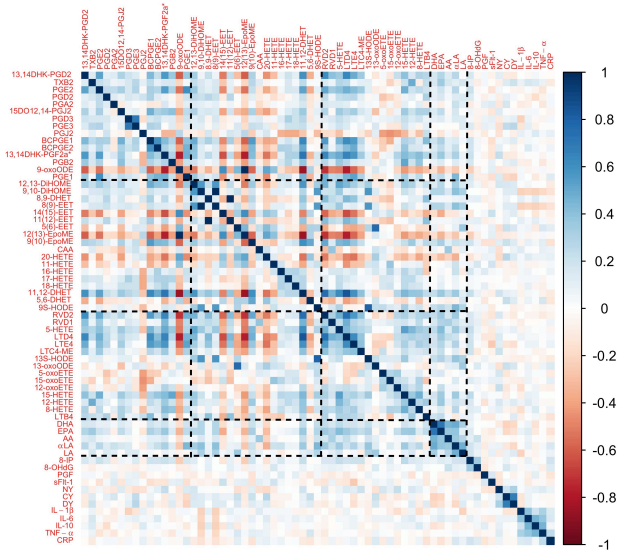

**C Preterm Associated with Aberrant Placentation and Controls (Weighted)**

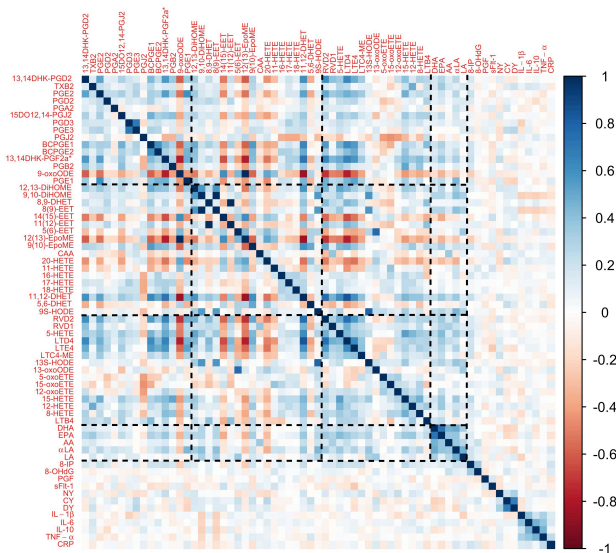

**Supplemental Figure 2. Weighted correlations among biomarkers.** Correlations were calculated using inverse probability weighting for all preterm (A), spontaneous preterm (B), and placental preterm (C) to account for case-control sampling.

**Supplemental Table 1. Log odds ratios (95% confidence interval) of preterm birth estimated using logistic regression and adaptive elastic-net**

| Biomarkers                     | All Preterm Birth    |                                   | Spontaneous Preterm Birth |                                   | Placental Preterm Birth |                                   |
|--------------------------------|----------------------|-----------------------------------|---------------------------|-----------------------------------|-------------------------|-----------------------------------|
|                                | Logistic Regression* | Adaptive Elastic-Net <sup>†</sup> | Logistic Regression*      | Adaptive Elastic-Net <sup>†</sup> | Logistic Regression*    | Adaptive Elastic-Net <sup>†</sup> |
| <b>CRP</b>                     | -0.18 (-0.54, 0.18)  | NA                                | -0.25 (-0.69, 0.19)       | NA                                | -0.02 (-0.57, 0.53)     | NA                                |
| <b>TNF-<math>\alpha</math></b> | 0.14 (-0.20, 0.48)   | NA                                | -0.06 (-0.46, 0.34)       | NA                                | 0.42 (-0.10, 0.94)      | NA                                |
| <b>IL-10</b>                   | 0.44 (0.09, 0.79)    | NA                                | 0.20 (-0.20, 0.60)        | NA                                | 0.71 (0.22, 1.20)       | NA                                |
| <b>IL-6</b>                    | 0.36 (-0.001, 0.72)  | NA                                | 0.32 (-0.12, 0.75)        | NA                                | 0.26 (-0.25, 0.76)      | NA                                |
| <b>IL-1<math>\beta</math></b>  | 0.14 (-0.21, 0.48)   | NA                                | 0.15 (-0.27, 0.58)        | NA                                | 0.19 (-0.34, 0.71)      | NA                                |
| <b>DY</b>                      | -0.07 (-0.42, 0.27)  | NA                                | -0.01 (-0.45, 0.42)       | NA                                | 0.02 (-0.48, 0.52)      | NA                                |
| <b>CY</b>                      | 0.15 (-0.19, 0.50)   | NA                                | 0.21 (-0.22, 0.64)        | NA                                | 0.15 (-0.36, 0.67)      | NA                                |
| <b>NY</b>                      | 0.26 (-0.12, 0.64)   | NA                                | 0.20 (-0.27, 0.67)        | NA                                | 0.07 (-0.44, 0.58)      | NA                                |
| <b>sFlt-1</b>                  | 0.17 (-0.18, 0.52)   | NA                                | 0.18 (-0.26, 0.62)        | NA                                | 0.05 (-0.46, 0.55)      | NA                                |
| <b>PGF</b>                     | -0.52 (-0.90, -0.14) | -0.24                             | -0.28 (-0.73, 0.16)       | NA                                | -1.23 (-1.92, -0.54)    | -0.15                             |
| <b>8-OHdG</b>                  | -0.23 (-0.60, 0.13)  | NA                                | -0.48 (-0.96, 0.002)      | NA                                | -0.11 (-0.59, 0.36)     | NA                                |
| <b>8-isoprostane</b>           | 0.02 (-0.40, 0.43)   | NA                                | 0.47 (-0.27, 1.22)        | NA                                | -0.25 (-0.78, 0.28)     | NA                                |
| <b>13,14DHK-PGD2</b>           | 0.54 (0.14, 0.94)    | NA                                | 1.01 (0.49, 1.53)         | NA                                | -0.15 (-0.63, 0.33)     | NA                                |
| <b>TXB2</b>                    | 0.16 (-0.18, 0.50)   | NA                                | 0.13 (-0.29, 0.54)        | NA                                | 0.18 (-0.32, 0.68)      | NA                                |
| <b>PGE2</b>                    | 0.28 (-0.09, 0.64)   | NA                                | 0.56 (0.05, 1.06)         | NA                                | -0.09 (-0.59, 0.41)     | NA                                |
| <b>PGD2</b>                    | 0.21 (-0.14, 0.57)   | NA                                | 0.24 (-0.20, 0.67)        | NA                                | 0.22 (-0.31, 0.74)      | NA                                |
| <b>PGA2</b>                    | 0.25 (-0.10, 0.61)   | NA                                | 0.41 (-0.05, 0.87)        | NA                                | 0.12 (-0.37, 0.61)      | NA                                |
| <b>15DO12,14-PGJ2</b>          | 0.41 (0.06, 0.77)    | 0.23                              | 0.76 (0.27, 1.26)         | 0.11                              | -0.12 (-0.60, 0.36)     | NA                                |
| <b>PGD3</b>                    | 0.19 (-0.17, 0.55)   | NA                                | 0.42 (-0.04, 0.89)        | NA                                | -0.04 (-0.54, 0.46)     | NA                                |
| <b>PGE3</b>                    | 0.01 (-0.34, 0.37)   | NA                                | 0.07 (-0.38, 0.52)        | NA                                | -0.02 (-0.53, 0.50)     | NA                                |
| <b>PGJ2</b>                    | -0.15 (-0.51, 0.20)  | NA                                | -0.48 (-0.93, -0.02)      | NA                                | 0.23 (-0.37, 0.83)      | NA                                |
| <b>BCPGE1</b>                  | 0 (-0.34, 0.34)      | NA                                | 0.23 (-0.18, 0.64)        | NA                                | -0.62 (-1.23, -0.01)    | NA                                |
| <b>BCPGE2</b>                  | 0.06 (-0.28, 0.40)   | NA                                | 0.23 (-0.18, 0.65)        | NA                                | -0.55 (-1.12, 0.03)     | NA                                |
| <b>13,14DHK-PGF2a*</b>         | 0.19 (-0.15, 0.54)   | NA                                | 0.61 (0.18, 1.05)         | NA                                | -0.49 (-1.07, 0.09)     | NA                                |
| <b>PGB2</b>                    | 0.30 (-0.13, 0.72)   | NA                                | 0.65 (0.07, 1.23)         | NA                                | -0.10 (-0.56, 0.36)     | NA                                |
| <b>9-oxoODE</b>                | -0.36 (-0.70, -0.02) | NA                                | -0.65 (-1.06, -0.25)      | NA                                | 0.30 (-0.33, 0.93)      | NA                                |
| <b>PGE1</b>                    | 0.16 (-0.19, 0.51)   | NA                                | 0.34 (-0.11, 0.79)        | NA                                | -0.23 (-0.71, 0.26)     | NA                                |
| <b>12,13-DiHOME</b>            | 0.32 (-0.02, 0.66)   | NA                                | 0.46 (0.05, 0.87)         | NA                                | 0.14 (-0.35, 0.64)      | NA                                |
| <b>9,10-DiHOME</b>             | 0.37 (-0.01, 0.74)   | NA                                | 0.65 (0.15, 1.16)         | NA                                | -0.06 (-0.58, 0.45)     | NA                                |
| <b>8,9-DHET</b>                | 0.49 (0.06, 0.91)    | NA                                | 0.78 (0.18, 1.37)         | NA                                | -0.001 (-0.51, 0.51)    | NA                                |
| <b>8(9)-EET</b>                | 0.37 (-0.01, 0.74)   | NA                                | 0.65 (0.15, 1.16)         | NA                                | -0.06 (-0.58, 0.45)     | NA                                |
| <b>14(15)-EET</b>              | -0.09 (-0.43, 0.25)  | NA                                | -0.26 (-0.65, 0.13)       | NA                                | 0.49 (-0.18, 1.16)      | NA                                |

|                              |                      |       |                      |       |                      |       |
|------------------------------|----------------------|-------|----------------------|-------|----------------------|-------|
| <b>11(12)-EET</b>            | 0.48 (0.06, 0.90)    | NA    | 0.77 (0.18, 1.35)    | NA    | -0.002 (-0.51, 0.50) | NA    |
| <b>5(6)-EET</b>              | -0.37 (-0.72, -0.01) | -0.10 | -0.63 (-1.08, -0.18) | -0.16 | 0.30 (-0.26, 0.86)   | NA    |
| <b>12(13)-EpoME</b>          | -0.36 (-0.70, -0.02) | NA    | -0.65 (-1.06, -0.25) | NA    | 0.30 (-0.33, 0.93)   | NA    |
| <b>9(10)-EpoME</b>           | 0.42 (0.04, 0.79)    | NA    | 0.91 (0.37, 1.46)    | NA    | -0.20 (-0.70, 0.31)  | NA    |
| <b>CAA</b>                   | 0.09 (-0.25, 0.43)   | NA    | 0.25 (-0.19, 0.69)   | NA    | -0.09 (-0.57, 0.39)  | NA    |
| <b>20-HETE</b>               | -0.13 (-0.47, 0.22)  | NA    | -0.35 (-0.77, 0.07)  | NA    | 0.49 (-0.13, 1.11)   | NA    |
| <b>11-HETE</b>               | -0.07 (-0.41, 0.27)  | NA    | -0.36 (-0.78, 0.05)  | NA    | 0.52 (-0.06, 1.10)   | NA    |
| <b>16-HETE</b>               | 0.04 (-0.31, 0.39)   | NA    | 0.10 (-0.35, 0.55)   | NA    | 0.01 (-0.50, 0.51)   | NA    |
| <b>17-HETE</b>               | -0.02 (-0.36, 0.32)  | NA    | 0.19 (-0.24, 0.62)   | NA    | -0.29 (-0.81, 0.23)  | NA    |
| <b>18-HETE</b>               | -0.002 (-0.34, 0.34) | NA    | 0.33 (-0.11, 0.76)   | NA    | -0.30 (-0.82, 0.23)  | NA    |
| <b>11,12-DHET</b>            | 0.5 (0.15, 0.86)     | NA    | 0.96 (0.52, 1.39)    | NA    | -0.78 (-1.58, 0.03)  | NA    |
| <b>5,6-DHET</b>              | -0.10 (-0.44, 0.25)  | NA    | -0.31 (-0.74, 0.12)  | NA    | 0.29 (-0.24, 0.81)   | NA    |
| <b>9S-HODE</b>               | 0.14 (-0.20, 0.48)   | NA    | 0.27 (-0.16, 0.70)   | NA    | 0.03 (-0.48, 0.55)   | NA    |
| <b>RVD2</b>                  | 0.21 (-0.12, 0.55)   | NA    | 0.46 (0.05, 0.87)    | NA    | -0.39 (-0.96, 0.17)  | NA    |
| <b>RVD1</b>                  | 0.65 (0.25, 1.05)    | NA    | 0.98 (0.47, 1.49)    | 0.02  | 0.14 (-0.44, 0.73)   | NA    |
| <b>5-HETE</b>                | 0.34 (-0.002, 0.69)  | NA    | 0.69 (0.25, 1.13)    | NA    | -0.16 (-0.66, 0.34)  | NA    |
| <b>LTD4</b>                  | 0.38 (0.03, 0.72)    | NA    | 0.88 (0.44, 1.32)    | NA    | -0.80 (-1.57, -0.03) | NA    |
| <b>LTE4</b>                  | 0.38 (-0.02, 0.89)   | NA    | 0.67 (0.17, 1.17)    | NA    | -0.18 (-0.86, 0.50)  | NA    |
| <b>LTC4-ME</b>               | 0.30 (-0.07, 0.66)   | NA    | 0.53 (0.04, 1.03)    | NA    | -0.10 (-0.56, 0.36)  | NA    |
| <b>13S-HODE</b>              | 0.28 (-0.08, 0.64)   | NA    | 0.45 (-0.01, 0.91)   | NA    | 0.33 (-0.22, 0.88)   | NA    |
| <b>13-oxoODE</b>             | -0.25 (-0.61, 0.10)  | NA    | -0.39 (-0.83, 0.05)  | NA    | 0.21 (-0.34, 0.76)   | NA    |
| <b>5-oxoETE</b>              | 0.28 (-0.08, 0.64)   | NA    | 0.57 (0.10, 1.05)    | 0.16  | -0.16 (-0.68, 0.37)  | NA    |
| <b>15-oxoETE</b>             | 0.17 (-0.19, 0.52)   | NA    | 0.12 (-0.33, 0.57)   | NA    | 0.26 (-0.27, 0.79)   | NA    |
| <b>12-oxoETE</b>             | 0.27 (-0.09, 0.63)   | NA    | 0.53 (0.06, 1.00)    | NA    | -0.20 (-0.72, 0.32)  | NA    |
| <b>15-HETE</b>               | 0.39 (0.02, 0.77)    | NA    | 0.67 (0.19, 1.15)    | NA    | -0.002 (-0.51, 0.50) | NA    |
| <b>12-HETE</b>               | 0.37 (0.01, 0.74)    | NA    | 0.51 (0.04, 0.98)    | NA    | 0.12 (-0.37, 0.62)   | NA    |
| <b>8-HETE</b>                | 0.29 (-0.09, 0.66)   | NA    | 0.49 (-0.04, 1.01)   | NA    | -0.01 (-0.49, 0.47)  | NA    |
| <b>LTB4</b>                  | -0.31 (-0.67, 0.04)  | -0.13 | 0.05 (-0.37, 0.47)   | NA    | -0.83 (-1.42, -0.23) | -0.10 |
| <b>DHA</b>                   | 0.36 (0, 0.73)       | NA    | 0.84 (0.35, 1.34)    | NA    | -0.44 (-1.04, 0.16)  | NA    |
| <b>EPA</b>                   | 0.43 (0.06, 0.79)    | NA    | 0.87 (0.37, 1.37)    | NA    | -0.29 (-0.84, 0.25)  | NA    |
| <b>AA</b>                    | 0.29 (-0.06, 0.64)   | NA    | 0.56 (0.10, 1.02)    | NA    | -0.08 (-0.59, 0.42)  | NA    |
| <b><math>\alpha</math>LA</b> | 0.50 (0.11, 0.88)    | NA    | 0.89 (0.33, 1.44)    | NA    | 0.07 (-0.47, 0.61)   | NA    |
| <b>LA</b>                    | 0.36 (-0.003, 0.72)  | 0.26  | 0.54 (0.07, 1.00)    | NA    | 0.20 (-0.34, 0.74)   | NA    |

\*Log odds ratios were estimated by fitting logistic regression on covariates and individual biomarkers (*Model 1*)

†Only point estimates are reported for the log odds ratios estimated by adaptive elastic-net. Zero coefficients are recorded as NA.
